# Supplementary material for: Complex PrEP: the factors requiring consultant-led review of PrEP users
Source: HighWire-hosted journal article supplement (doi:10.1136/sextrans-2021-055277), 2022-02-15

**Supplementary figure 1. IMPACT algorithm for managing abnormal renal parameters (\*depending on local pathways & patient preference)**

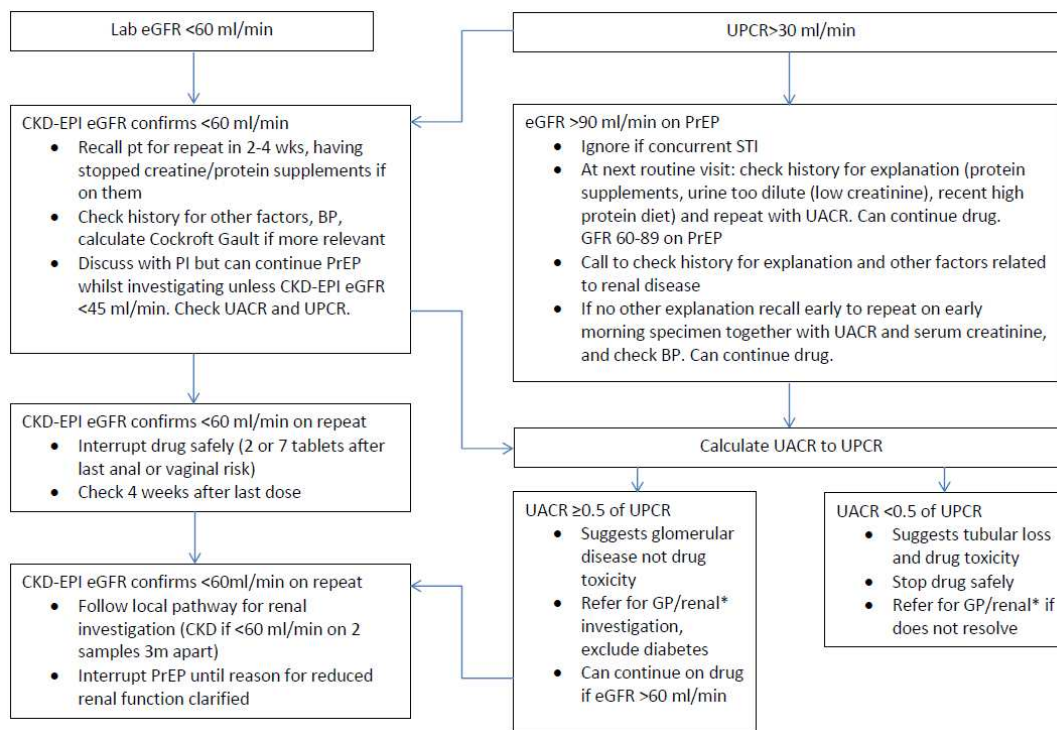

Supplement: sextrans-2021-055277supp001_data_supplement.pdf [file sextrans-2021-055277supp001_data_supplement.pdf]
