# Supplementary material for: Complex PrEP: the factors requiring consultant-led review of PrEP users
Source: HighWire-hosted journal article supplement (doi:10.1136/sextrans-2021-055277), 2022-02-15
Supplement: sextrans-2021-055277supp002_data_supplement.pdf [file sextrans-2021-055277supp002_data_supplement.pdf]

**Supplementary table 2. Management plan for PrEP users with referral eGFR 45-59 (ml/min/1.73m<sup>2</sup>) (n=35)**

| Management plan                                                                                                                       |                                                           | Total number of PrEP users (n) | Outcomes:                                 |                                     |                                    | Follow-up eGFR (by CKD category) at median days of =74 days |                                                                  |                                                               |
|---------------------------------------------------------------------------------------------------------------------------------------|-----------------------------------------------------------|--------------------------------|-------------------------------------------|-------------------------------------|------------------------------------|-------------------------------------------------------------|------------------------------------------------------------------|---------------------------------------------------------------|
|                                                                                                                                       |                                                           |                                | Started/Continued with event-based dosing | Started/Continued with daily dosing | Discontinued /decided not to start | Improved: eGFR increased >59 (ml/min/1.73m <sup>2</sup> )   | Stable: eGFR remained between 45-59 (ml/min/1.73m <sup>2</sup> ) | Reduction: eGFR reduced to 30-44 (ml/min/1.73m <sup>2</sup> ) |
| Known renal history, eGFR already being monitored. Risk benefit assessed, switched to event-based dosing and more frequent monitoring |                                                           | 3                              | 3                                         | 0                                   | 0                                  | 0                                                           | 2                                                                | 1 <sup>+</sup>                                                |
| High protein intake/supplements/recreational drugs                                                                                    | Stop supplements and repeat                               | 14                             | 1                                         | 12                                  | 1                                  | 3                                                           | 9                                                                | 1 <sup>++</sup>                                               |
|                                                                                                                                       | Stop supplements, switch to event-based dosing and repeat | 10 *                           | 7                                         | 1                                   | 0                                  | 4                                                           | 4                                                                | 0                                                             |
| Renal function >59 (ml/min/1.73m <sup>2</sup> ) when using                                                                            |                                                           | 4                              | 0                                         | 4                                   | 0                                  | n/a                                                         | n/a                                                              | n/a                                                           |

|                                                                                                                                                                                                                                                                                                                   |   |   |   |   |     |     |     |
|-------------------------------------------------------------------------------------------------------------------------------------------------------------------------------------------------------------------------------------------------------------------------------------------------------------------|---|---|---|---|-----|-----|-----|
| Cockcroft Gault equation                                                                                                                                                                                                                                                                                          |   |   |   |   |     |     |     |
| Repeated bloods/eGFR were >59 (ml/min/1.73m <sup>2</sup> )                                                                                                                                                                                                                                                        | 3 | 0 | 3 | 0 | n/a | n/a | n/a |
| Reviewed risk benefit and decided not to start                                                                                                                                                                                                                                                                    | 1 | 0 | 0 | 1 | n/a | n/a | n/a |
| Footnotes:<br>+ reduced by 5 ml/min/1.73m <sup>2</sup> , GP reviewing and monitoring<br>++ reduced by 4 ml/min/1.73m <sup>2</sup> , advised to return to clinic, but not attended<br>*2 missing because 1 PrEP user requested GP follow-up and was not seen again in clinic and 1 PrEP user was lost to follow-up |   |   |   |   |     |     |     |
