# Supplementary material for: Complex PrEP: the factors requiring consultant-led review of PrEP users
Source: HighWire-hosted journal article supplement (doi:10.1136/sextrans-2021-055277), 2022-02-15
Supplement: sextrans-2021-055277supp003_data_supplement.pdf [file sextrans-2021-055277supp003_data_supplement.pdf]

**Supplementary table 3. Management plan for PrEP users with referral eGFR 30-44 (ml/min/1.73m<sup>2</sup>) (n=10)**

| Management plan                                                 |                                                           | Total number of unique PrEP users (n) | Outcomes (n)                              |                                     |                                   | Follow-up eGFR (by CKD category) at median days of =95days |                                                             |                                                         |                                                             |
|-----------------------------------------------------------------|-----------------------------------------------------------|---------------------------------------|-------------------------------------------|-------------------------------------|-----------------------------------|------------------------------------------------------------|-------------------------------------------------------------|---------------------------------------------------------|-------------------------------------------------------------|
|                                                                 |                                                           |                                       | Started/Continued with event-based dosing | Started/Continued with daily dosing | Discontinued/decided not to start | Improved: eGFR increased >59 (ml/min/1.73m <sup>2</sup> )  | Improved: eGFR increased 45-59 (ml/min/1.73m <sup>2</sup> ) | GFR remained between 30-44 (ml/min/1.73m <sup>2</sup> ) | Reduction: eGFR reduced to <30 (ml/min/1.73m <sup>2</sup> ) |
| Trial of event-based dosing and repeat eGFR, given risk/benefit |                                                           | 1                                     | 0                                         | 0                                   | 1                                 | 0                                                          | 0                                                           | 0                                                       | 1*                                                          |
| High protein intake/supplements/recreation and normalised       | Stop supplements and repeat                               | 3                                     | 3                                         | 0                                   | 0                                 | 2                                                          | 1                                                           | 0                                                       | 0                                                           |
|                                                                 | Stop supplements, switch to event-based dosing and repeat | 3                                     | 3                                         | 0                                   | 0                                 | 2                                                          | 1                                                           | 0                                                       | 0                                                           |
| Urgent GP/hospital review                                       |                                                           | 1                                     | 0                                         | 0                                   | 1                                 | n/a                                                        | n/a                                                         | n/a                                                     | n/a                                                         |
| Reviewed risk benefit and decided not to start                  |                                                           | 2                                     | 0                                         | 0                                   | 2                                 | n/a                                                        | n/a                                                         | n/a                                                     | n/a                                                         |
| Footnote                                                        |                                                           |                                       |                                           |                                     |                                   |                                                            |                                                             |                                                         |                                                             |

\*reduced by 3 (ml/min/1.73m<sup>2</sup>) and discontinued
