# Supplementary material for: Complex PrEP: the factors requiring consultant-led review of PrEP users
Source: HighWire-hosted journal article supplement (doi:10.1136/sextrans-2021-055277), 2022-02-15
Supplement: sextrans-2021-055277supp004_data_supplement.pdf [file sextrans-2021-055277supp004_data_supplement.pdf]

**Supplementary table 4. Summary of side effect management, using 1 or more of the following strategies**

Alternative causes/explanations from history/investigations  
Investigation into alternative explanations  
Reassurance  
Offered allergy clinic review  
Stop prep (including bullous allergic reaction, abnormal blood results)  
Supportive therapies (anti-histamines, anti-emetics, paracetamol, probiotics)  
Slowly build up tolerance to TDF/FTC (take 1/4 pill, ½ pill, whole pill over the course of 3-7 days whilst no risk of HIV)  
Switch to EBD  
Switch to daily dosing  
Switch PrEP brand  
Take at different times of the day  
Take with food  
Trial PrEP break
